# Supplementary material for: CdS-decorated UiO–66(NH2) nanocomposites fabricated by a facile photodeposition process: an efficient and stable visible-light-driven photocatalyst for selective oxidation of alcohols
Source: Royal Society of Chemistry journal article supplement (doi:10.1039/c3ta12645e), 2013-01-01
Supplement: c3ta12645e.pdf [file c3ta12645e.pdf]

## *Electronic Supplementary Information for the manuscript*

CdS-decorated UiO-66(NH<sub>2</sub>) nanocomposites  
fabricated by a facile photodeposition process:  
an efficient and stable visible-light-driven  
photocatalyst for selective oxidation of alcohols

*Lijuan Shen,<sup>a</sup> Shijing Liang,<sup>a</sup> Weiming Wu,<sup>a</sup> Ruowen Liang,<sup>a</sup> Ling Wu<sup>a,b\*</sup>*

*a: Research Institute of Photocatalysis, Fujian Provincial Key Laboratory of*

*Photocatalysis--State Key Laboratory Breeding Base, Fuzhou University, Fuzhou*

*350002, P. R. China*

*b: State Key Laboratory of Structural Chemistry, Fujian Institute of Research on the*

*Structure of Matter, Chinese Academy of Sciences, Fuzhou, Fujian 350002, China*

*\* Corresponding Author. Tel.: +86 591 83779105; E-mail: [wuling@fzu.edu.cn](mailto:wuling@fzu.edu.cn)*

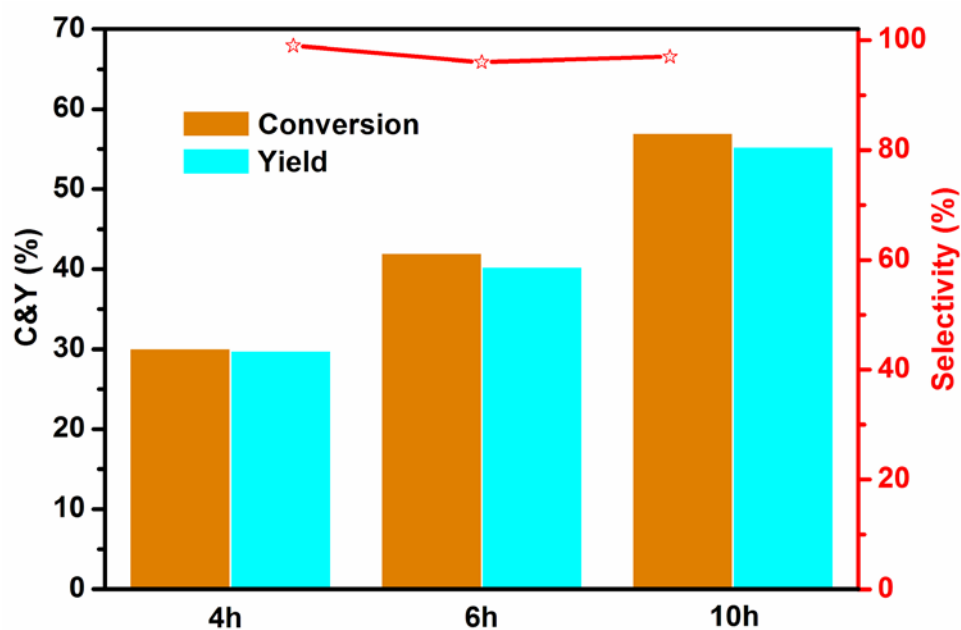

**Fig. S1** Photocatalytic selective oxidation of benzyl alcohol over the sample CdS-U6 (8 mg) with different illumination time ( $\lambda \geq 420$  nm).

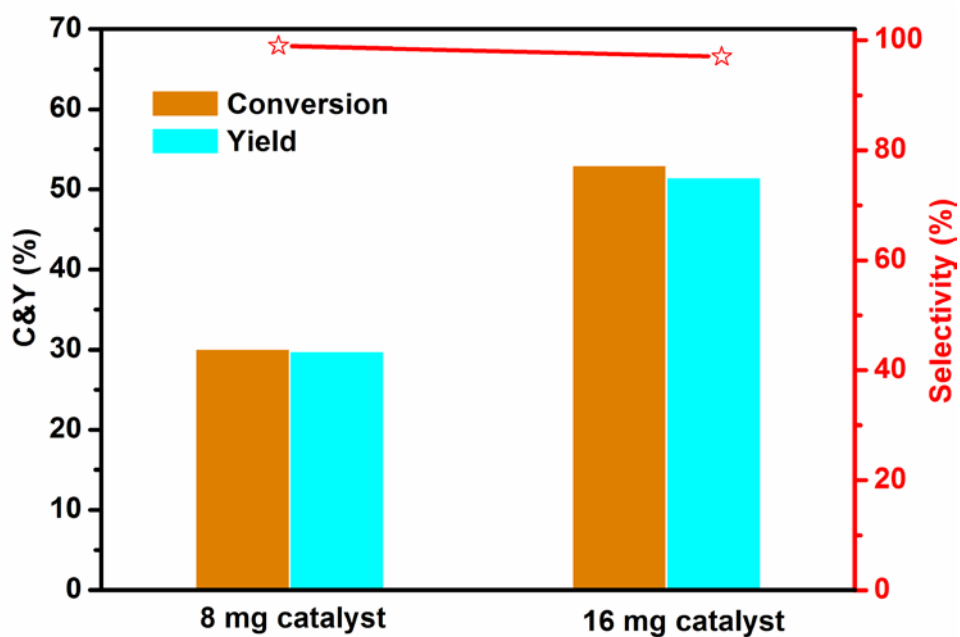

**Fig. S2** Photocatalytic selective oxidation of benzyl alcohol over the sample CdS-U6 with different catalyst amount under visible light irradiation for 4h ( $\lambda \geq 420$  nm).

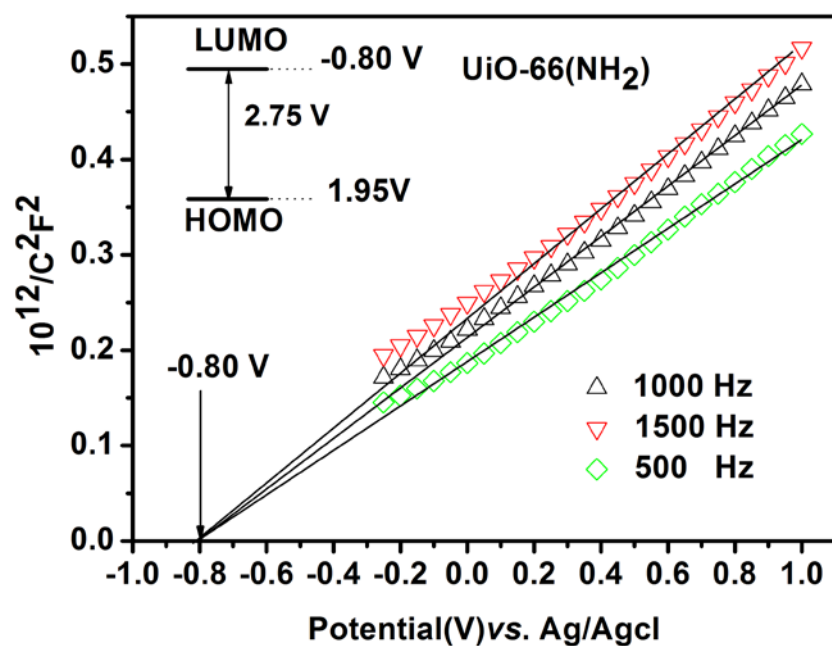

**Fig. S3** Mott-Schottky plot of UiO-66(NH<sub>2</sub>) in 0.2 M Na<sub>2</sub>SO<sub>4</sub> aqueous solution (pH = 6.8).

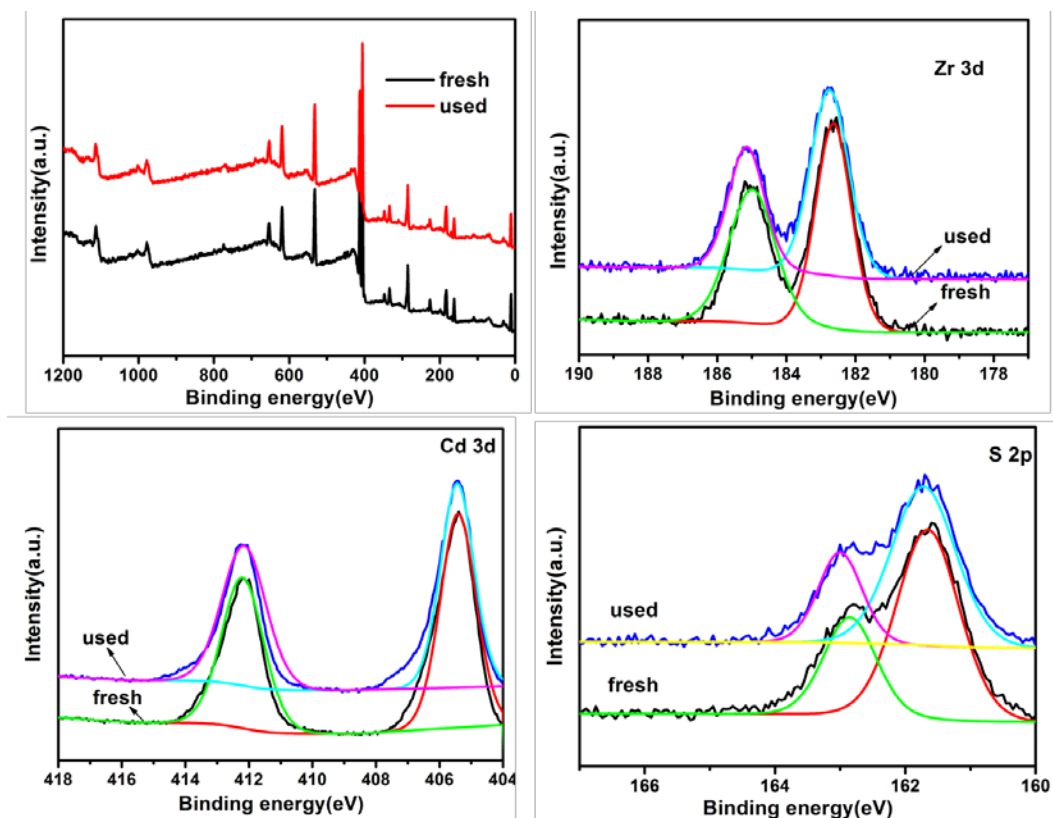

**Fig. S4** XPS patterns of CdS-U6 before and after the photocatalytic reaction.

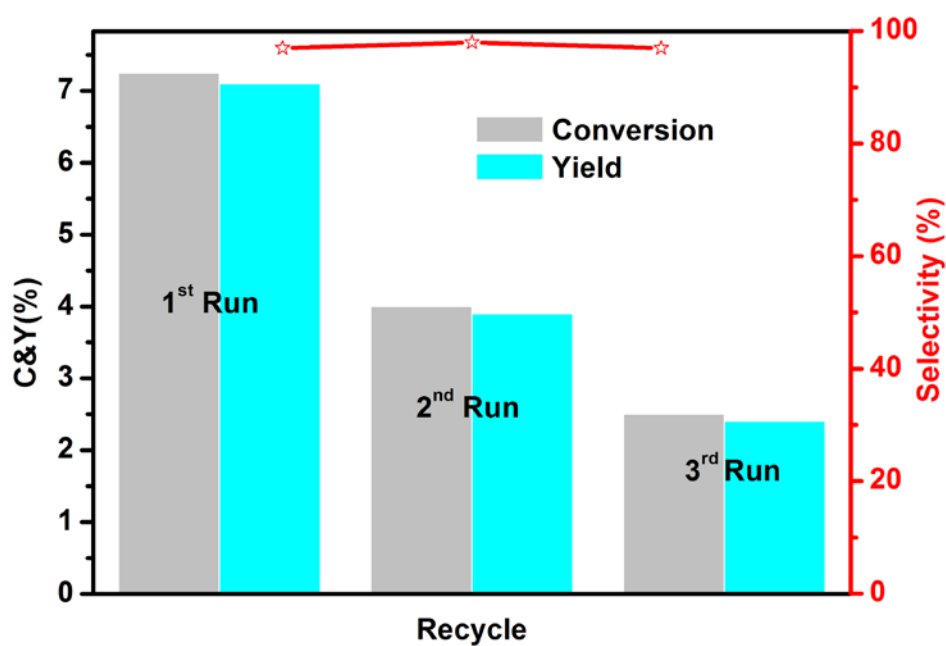

**Fig. S5** Reusability of commercial CdS for the photocatalytic selective oxidation of benzyl alcohol.

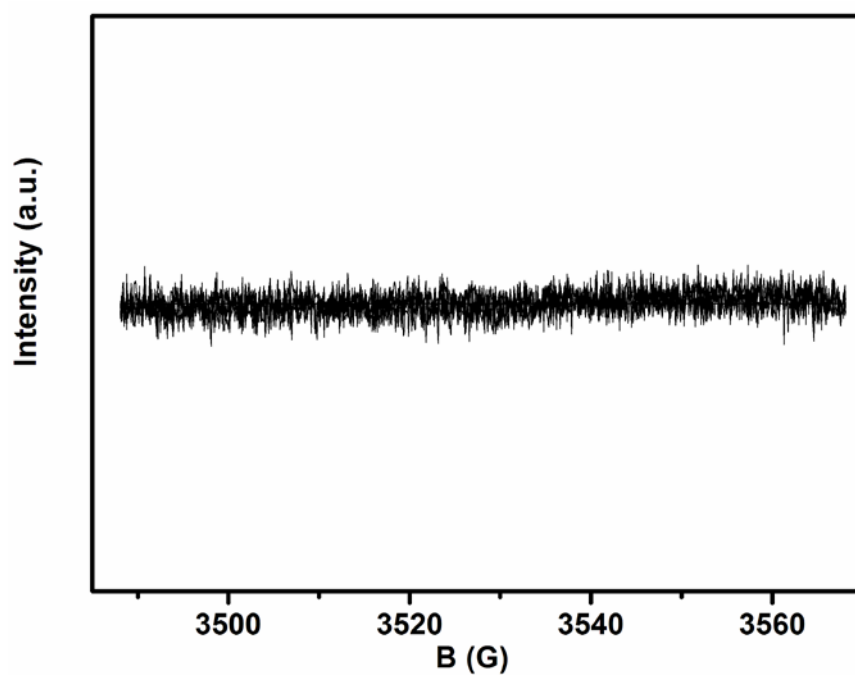

**Fig. S6** ESR spectrum of the radical adduct trapped by DMPO (DMPO-OH<sup>•</sup>) in BTF over CdS-U6.
